# Supplementary material
Source: PubMed Central journal article supplement (PMC2891017)
Supplement: NIHMS201473-supplement-Supplementary_Table.pdf [file NIHMS201473-supplement-Supplementary_Table.pdf]

**Supplementary Table 1** Functional analysis of genes that are differentially expressed in the mouse brain following reovirus infection at early times post infection<sup>a</sup>

| General function | Specific function         | Biological process                     | Gene symbol                                               | Description                                         | 3D                                                                                      | 6D    | 8D    |      |
|------------------|---------------------------|----------------------------------------|-----------------------------------------------------------|-----------------------------------------------------|-----------------------------------------------------------------------------------------|-------|-------|------|
| Immune response  | Transcription             | Interferon type 1 biosynthetic process | Irf9                                                      | Interferon regulatory factor 9                      | 4.0                                                                                     | 5.6   | 9.2   |      |
|                  |                           |                                        | Irf7                                                      | Interferon regulatory factor 7                      | 11.7                                                                                    | 24.7  | 65.0  |      |
|                  |                           | Cytokine and chemokine signaling       | STAT1                                                     | Signal transducer and activator of transcription 1  | 8.4                                                                                     | 11.8  | 33.9  |      |
|                  |                           |                                        | Stat2                                                     | Signal transducer and activator of transcription 2  | 1.8                                                                                     | 0     | 6.3   |      |
|                  |                           |                                        | Nmi                                                       | N-myc (and Stat1) interactor                        | 2.0                                                                                     | 2.8   | 9.7   |      |
|                  |                           | PML body                               | Pml                                                       | Promyocytic leukemia                                | 9.5                                                                                     | 0     | 11.3  |      |
|                  |                           |                                        | Sp100                                                     | Nuclear antigen Sp100                               | 0                                                                                       | 35.5  | 81.1  |      |
|                  |                           | Endopeptidase                          | Antigen presentation                                      | Psmb8                                               | Proteasome (prosome, macropain) subunit, beta type 8 (large multifunctional protease 7) | 7.2   | 14.3  | 92.3 |
|                  |                           |                                        |                                                           | Psmb9                                               | Proteasome (prosome, macropain) subunit, beta type 9 (large multifunctional protease 2) | 1.3   | 5.2   | 27.3 |
|                  |                           |                                        |                                                           | Ctss                                                | Cathepsin C                                                                             | 1.5   | 1.6   | 4.2  |
|                  | MHC class II presentation | Antigen presentation                   | Ctss                                                      |                                                     |                                                                                         |       |       |      |
|                  | MHC class I presentation  | Antigen presentation                   | H2-K1                                                     | Histocompatibility 2, K1, K region                  | 1.5                                                                                     | 3.5   | 19.6  |      |
|                  |                           |                                        | H2-T10                                                    | Histocompatibility 2, T region locus 10             | 2.4                                                                                     | 0     | 21.7  |      |
|                  |                           |                                        | H2-T23                                                    | Histocompatibility 2, T region locus 23             | 4.3                                                                                     | 0     | 64.7  |      |
|                  |                           |                                        | B2M                                                       | Beta-2 microglobulin                                | 2.6                                                                                     | 3.7   | 9.6   |      |
|                  |                           |                                        | Fcg                                                       | Fc receptor, IgG, high affinity 1                   | 1.9                                                                                     | 0     | 17.1  |      |
|                  |                           |                                        | Fcer1g                                                    | Fc receptor, IgE, high affinity 1 gamma polypeptide | 0                                                                                       | 1.9   | 9.4   |      |
|                  |                           |                                        | Tapbp                                                     | TAP binding protein                                 | 1.9                                                                                     | 0     | 12.7  |      |
|                  | GTP binding               | Interferon induced                     | Gbp2                                                      | Guanylate nucleotide binding protein 2              | 8.9                                                                                     | 53.6  | 111.4 |      |
|                  |                           |                                        | Gbp3                                                      | Guanylate nucleotide binding protein 3              | 5.2                                                                                     | 14.2  | 36.8  |      |
|                  |                           |                                        | Gbp6                                                      | Guanylate nucleotide binding protein 6              | 6.5                                                                                     | 10.1  | 32.9  |      |
|                  |                           |                                        | Irgm1                                                     | Immunity related GTPase family M1                   | 7.2                                                                                     | 8.8   | 41.4  |      |
|                  |                           |                                        | Mpa2l                                                     | Macrophage activation like 2                        | 9.2                                                                                     | 13.4  | 83.6  |      |
|                  |                           |                                        | Igtp                                                      | Interferon gamma induced GTPase                     | 15.6                                                                                    | 18.5  | 163.1 |      |
|                  | GTPase                    | Interferon induced                     | Mx1                                                       | Myxovirus (influenza virus) resistance 1            | 7.0                                                                                     | 0     | 84.2  |      |
|                  |                           |                                        | Mx2                                                       | Myxovirus (influenza virus) resistance 2            | 31.9                                                                                    | 38.1  | 129.7 |      |
|                  |                           |                                        | Iigp1                                                     | Interferon inducible GTPase 1                       | 25.6                                                                                    | 22.2  | 295.5 |      |
|                  |                           |                                        | Iigp2                                                     | Interferon inducible GTPase 2                       | 9.7                                                                                     | 10.7  | 96.2  |      |
|                  |                           |                                        | Tgtp                                                      | T cell specific GTPase                              | 16.9                                                                                    | 31.3  | 508.4 |      |
|                  |                           |                                        | Oas1b                                                     |                                                     | 5.3                                                                                     | 0     | 24.9  |      |
| Oas1g            |                           |                                        | 2'-5'oligoadenylate synthetase 1b                         | 5.8                                                 | 12.4                                                                                    | 33.7  |       |      |
| Oas2             |                           |                                        | 2'-5'oligoadenylate synthetase 1g                         | 2.8                                                 | 0                                                                                       | 20.7  |       |      |
| Oas1             |                           |                                        | 2'-5'oligoadenylate synthetase 2                          | 3.3                                                 | 0                                                                                       | 29.0  |       |      |
| Oasl2            |                           |                                        | 2'-5'oligoadenylate synthetase-like 1                     | 32.9                                                | 80.3                                                                                    | 259.6 |       |      |
| RNA binding      | Interferon induced        | Oasl2                                  | 2'-5'oligoadenylate synthetase-like 2                     |                                                     |                                                                                         |       |       |      |
|                  |                           | Ifit1                                  | Interferon-induced protein with tetraco peptide repeats 1 | 46.6                                                | 104.9                                                                                   | 233.9 |       |      |
|                  |                           | Ifit2                                  | Interferon-induced protein with tetraco peptide repeats 2 | 2.7                                                 | 0                                                                                       | 25.8  |       |      |
| DNA binding      | Interferon induced        | Ifit1                                  | Interferon-induced protein with tetraco peptide repeats 1 | 46.6                                                | 104.9                                                                                   | 233.9 |       |      |
|                  |                           | Ifit2                                  | Interferon-induced protein with tetraco peptide repeats 2 | 2.7                                                 | 0                                                                                       | 25.8  |       |      |

**Supplementary Table 1** (Continued)

| General function | Specific function     | Biological process                        | Gene symbol                            | Description                                                | 3D                                                        | 6D                                         | 8D    |       |
|------------------|-----------------------|-------------------------------------------|----------------------------------------|------------------------------------------------------------|-----------------------------------------------------------|--------------------------------------------|-------|-------|
|                  |                       |                                           | Ifit3                                  | Interferon-induced protein with tetraco peptide repeats 3  | 14.6                                                      | 25.2                                       | 127.7 |       |
|                  | Helicase              | Interferon induced                        | Ifih1                                  | Interferon-induced protein with helicase C domain 1        | 6.7                                                       | 9.7                                        | 45.1  |       |
|                  |                       |                                           | Interferon type I biosynthetic process | Dhx58                                                      | DEXH (Asp-glu-X-His) box polypeptide 58                   | 7.7                                        | 27.8  | 49.0  |
|                  |                       |                                           |                                        | Ddx58                                                      | DEAD (Asp-Glu-Ala-Asp) box polypeptide 58                 | 4.9                                        | 0     | 11.9  |
|                  | Protein binding       | NC                                        | Ifi203                                 | Interferon-activated gene 203                              | 0                                                         | 3.3                                        | 15.7  |       |
|                  |                       |                                           |                                        | Pyhin1                                                     | Pyrin and HIN domain family, member 1                     | 5.1                                        | 0     | 81.5  |
|                  | Receptor activity     | Tlr signaling                             | TLR3                                   | Toll-like receptor 3                                       | 2.5                                                       | 0                                          | 8.8   |       |
|                  |                       |                                           |                                        | Interferon induced                                         | Ifitm1                                                    | Interferon-induced transmembrane protein 1 | 0     | 1.9   |
|                  |                       |                                           | Ifitm3                                 | Interferon-induced transmembrane protein 3                 | 6.3                                                       | 9.3                                        | 20.9  |       |
|                  |                       | Cell adhesion                             | Lgals9                                 | Lectin, galactosidase-binding, soluble 9                   | 4.4                                                       | 6.1                                        | 22.6  |       |
|                  |                       |                                           | Lgals3bp                               | Lectin, galactosidase-binding, soluble, 3 binding protein  | 8.2                                                       | 12.9                                       | 34.5  |       |
|                  |                       |                                           | Icam1                                  | Intercellular adhesion molecule 1                          | 0                                                         | 2.2                                        | 10.0  |       |
|                  |                       | NC                                        | Itgb2                                  | Integrin beta 2                                            | 0                                                         | 1.3                                        | 7.7   |       |
|                  |                       |                                           | Ly6e                                   | Lymphocyte antigen 6 complex, locus e                      | 1.6                                                       | 2.5                                        | 5.0   |       |
|                  | Exonuclease           | Interferon induced                        | Isg20                                  | Interferon-stimulated protein                              | 4.5                                                       | 0                                          | 33.6  |       |
|                  | Kinase                | Interferon induced                        | Eif2ak2                                | Eukaryotic translation initiation factor 2-alpha kinase 2  | 3.3                                                       | 0                                          | 10.8  |       |
|                  | Cytokine/chemokine    | Chemotaxis                                | Ccl12                                  | Chemokine (C-C motif) ligand 12                            | 0                                                         | 20.5                                       | 53.2  |       |
|                  |                       |                                           |                                        | Cxcl10                                                     | Chemokine (C-X-C motif) ligand 10                         | 23.1                                       | 0     | 248.8 |
|                  |                       |                                           | Cxcl11                                 | Chemokine (C-X-C motif) ligand 11                          | 7.5                                                       | 0                                          | 198.6 |       |
|                  |                       | Apoptosis                                 | Tnfsf10                                | Tumor necrosis factor (ligand) superfamily, member 10      | 1.7                                                       | 2.1                                        | 10.8  |       |
|                  | Peptidase             | Complement activation                     | C2                                     | Complement component 2 (within H2-S)                       | 0                                                         | 3.5                                        | 10.7  |       |
|                  | Phosphate transport   | Complement activation                     | C1qb                                   | Complement component 1, q subcomponent, beta polypeptide   | 1.8                                                       | 0                                          | 7.5   |       |
|                  |                       |                                           |                                        | C1qa                                                       | Complement component 1, q subcomponent, alpha polypeptide | 1.6                                        | 1.9   | 5.2   |
|                  |                       |                                           |                                        | C1qc                                                       | Complement component 1, q subcomponent, C chain           | 1.5                                        | 2.1   | 7.9   |
|                  | Complement binding    | Complement activation                     | Serping1                               | Serine (or cysteine) peptidase inhibitor, clade G member 1 | 0                                                         | 1.8                                        | 18.3  |       |
|                  | Poly-A-polymerase     | NC                                        | Parp 9                                 | Poly (ADP-ribose) polymerase family, member 9              | 8.3                                                       | 11.7                                       | 46.4  |       |
|                  | Catalytic activity    | Virus response                            | Rsad2                                  | Radical S-adenosyl methionine domain containing 2          | 6.7                                                       | 0                                          | 70.8  |       |
|                  | NC                    | IFN induced                               | Ifi44                                  | Interferon-induced protein 44                              | 17.5                                                      | 33.4                                       | 152.2 |       |
|                  |                       | Interferon induced                        | Ifi47                                  | Interferon gamma inducible protein 47                      | 7.7                                                       | 11.9                                       | 154.9 |       |
|                  | NC                    | NC                                        | Ifi202b                                | Interferon-activated 202B                                  | 21.9                                                      | 35.5                                       | 353.8 |       |
|                  | NC                    | Natural killer cell mediated cytotoxicity | Plac8                                  | Placenta specific 8                                        | 6.1                                                       | 17.6                                       | 93.1  |       |
|                  |                       |                                           |                                        | Cd48                                                       | CD48 antigen                                              | 0                                          | 1.9   | 8.4   |
|                  |                       |                                           | Tyrobp                                 | TYRO protein tyrosine kinase binding protein               | 0                                                         | 1.4                                        | 3.2   |       |
| Defense response | GPI anchored          | Cell proliferation                        | Ly6a                                   | Lymphocyte antigen 6 complex, locus A                      | 4.3                                                       | 14.7                                       | 45.5  |       |
|                  | Macrophage associated | NC                                        | Mpeg1                                  | Macrophage expressed gene 1                                | 1.1                                                       | 0                                          | 8.9   |       |
|                  | Lysozyme activity     | Defense response to bacteria              | Lyz2                                   | Lysozyme 2                                                 | 2.0                                                       | 2.3                                        | 14.5  |       |
|                  |                       |                                           | Lyz1                                   | Lysozyme 1                                                 | 2                                                         | 2.9                                        | 15.2  |       |

**Supplementary Table 1** (Continued)

| General function     | Specific function                                       | Biological process                           | Gene symbol                                     | Description                                                      | 3D           | 6D   | 8D    |
|----------------------|---------------------------------------------------------|----------------------------------------------|-------------------------------------------------|------------------------------------------------------------------|--------------|------|-------|
| Ubiquitin cycle      | Ubiquitin ligase                                        | Interferon induced NC Protein modification   | Dtx31                                           | Deltrex 3-like ( <i>Drosophila</i> )                             | 3.9          | 5.9  | 21.6  |
|                      |                                                         |                                              | Herc5                                           | Hect domain and RLD5                                             | 2.9          | 0    | 25.9  |
|                      |                                                         |                                              | Trim25                                          | Tripartate motif protein 25                                      | 2.1          | 2.6  | 7.5   |
|                      |                                                         |                                              | Trim21                                          | Tripartate motif protein 21                                      | 3.2          | 2.5  | 12.7  |
|                      |                                                         |                                              | Ube2L6                                          | Ubiquitin conjugating enzymeE2L6                                 | 0            | 2.6  | 15.7  |
|                      | Ubiquitin activating Peptidase                          | Protein modification Interferon induced NC   | Ube1l                                           |                                                                  | 4.8          | 2.9  | 24.4  |
| Signal transduction  | Receptor                                                | NC                                           | Ms4a4d                                          | Membrane-spanning 4-domains, subfamily A, member 4d              | 1.6          | 3.2  | 24.3  |
|                      |                                                         |                                              | Ms4a4c                                          | Membrane-spanning 4-domains, subfamily A, member4c               | 0            | 11.2 | 116.6 |
|                      |                                                         |                                              | Ms4a4b                                          | Membrane-spanning 4-domains, subfamily A, member 4b              | 2.1          | 2.2  | 25.0  |
|                      | Transmembrane receptor protein tyrosine kinase activity | NC                                           | Pik3ap1                                         | Phosphoinositide 3 kinase adaptor protein 1                      | 1.5          | 2.1  | 12.6  |
| Chaperone Metabolism | ATP binding                                             | Protein folding                              | Tor3a                                           | Torsin family 3, member A                                        | 2.8          | 0    | 15.9  |
|                      | Phospholipase                                           | Lipid catabolism                             | Pld4                                            | Phospholipase D family member 4                                  | 0            | 1.6  | 4.2   |
|                      | Acyltransferase activity                                | Lipid metabolism                             | Lpcat1                                          | Lysophosphatidylcholine acetyltransferase 1                      | -2.2         | 0    | 0     |
| domain containing NC | Inflammatory response                                   | Protein binding                              | Apoptosis                                       | Pycard                                                           | PYD and CARD |      |       |
|                      | 1.6                                                     | 0                                            | 8.4                                             |                                                                  |              |      |       |
|                      | P53 signal transduction                                 | Apoptosis                                    | Nupr1                                           | Nuclear protein 1                                                | 0            | 1.6  | 3.1   |
|                      | Poly-A-polymerase                                       | Transcription regulation NC                  | Parp14                                          |                                                                  | 5.6          | 6.8  | 47.7  |
|                      | Transcriptional regulation                              | IL6 biosynthetic process                     | Parp12                                          | CCAAT enhancer binding protein                                   | 4.6          | 6.3  | 22.4  |
|                      | Apoptosis                                               | Interferon induced                           | Cebpb (C/EBP), beta XAF-1                       | XIAP associated factor 1                                         | 0            | 1.4  | 4.7   |
|                      | Caspase activity                                        | Apoptosis                                    | Casp 4                                          | Casapse 4                                                        | 14.1         | 17.8 | 65.3  |
|                      | P53 signaling                                           | Apoptosis                                    | Casp 5                                          | Shisa homolog 5                                                  | 0            | 48.3 | 198.4 |
|                      | Ras protein signal transduction                         | Cytokine-cytokine receptor interaction       | Csf1                                            | Colony-stimulating factor 1                                      | 1.4          | 0    | 2.8   |
|                      | Helicase                                                | NC                                           | Mov10                                           | Moloney leukemia virus 10                                        | 0            | 2.0  | 4.1   |
|                      | Protein transport                                       | NC                                           | Mitd1                                           | RMIT, microtubule interacting and transport, domain containing 1 | 1.3          | 0    | 3.3   |
|                      | GTP binding                                             | G protein coupled receptor protein signaling | Tgm2                                            | Transglutaminase 2, C polypeptide                                | 1.9          | 0    | 4.7   |
|                      | GTPase                                                  | Small GTPase mediated signal transduction    | Rac2                                            | Ras-related C3 botulinum substrate 2                             | 0            | 1.2  | 8.6   |
|                      | GTP cyclohydrolase I activity                           | Neuromuscular process                        | Gch1                                            | GTP cyclohydrolase 1                                             | 0            | 1.5  | 4.4   |
|                      | Ferroxidase activity                                    | Oxidation/reduction                          | Cp                                              | Ceruloplasmin                                                    | 0            | 1.5  | 5.0   |
| Iron ion binding     | Oxidation/reduction                                     | Cyba                                         | Cytochrome b-245, alpha polypeptide             | 0                                                                | 1.7          | 6.4  |       |
| Transport Receptor   | NC                                                      | Apod Rtp4                                    | Apolipoprotein D Receptor transporter protein 4 | 0                                                                | 1.4          | 4.5  |       |
|                      |                                                         |                                              |                                                 | 1.8                                                              | 2.9          | 7.5  |       |
|                      |                                                         |                                              |                                                 | 15.3                                                             | 32.3         | 58.7 |       |

**Supplementary Table 1** (Continued)

| General function      | Specific function            | Biological process                       | Gene symbol                | Description                                   | 3D   | 6D   | 8D    |
|-----------------------|------------------------------|------------------------------------------|----------------------------|-----------------------------------------------|------|------|-------|
|                       | Protein/nucleic acid binding | Interferon-induced Interferon induced NC | Trim 34                    | Tripartite motif protein 34                   | 2.3  | 0    | 7.7   |
|                       |                              |                                          | Trim 30                    | Tripartite motif protein 30                   | 3.4  | 2.8  | 23.4  |
|                       |                              |                                          | Phf20l1                    | PHD finger protein 20-like 1                  | 3.0  | 4.3  | 13.2  |
|                       | Actin binding                | NC                                       | Brd4                       | Bromodomain containing 4                      | 12.0 | 21.9 | 114.3 |
|                       |                              |                                          | Plec1                      | Plectin 1                                     | 2.5  | 0    | 23.5  |
|                       |                              |                                          | Lcp-1                      | Lymphocyte cytosolic protein 1                | 0    | 1.8  | 6.8   |
|                       |                              | Regulation of actin cytoskeleton         | Arpc1b                     | Actin-related protein 2/3 complex, subunit 1b | 0    | 1.3  | 2.9   |
|                       | NC                           | Interferon induced                       | Ifi35                      | Interferon-induced protein 35                 | 6.2  | 9.7  | 56.1  |
|                       |                              | Cell-cell adhesion                       | Itgal                      | Integrin alpha L                              | 0    | 1.7  | 4.3   |
|                       |                              | NC                                       | CD52                       | CD52 antigen                                  | 0    | 4.1  | 27.1  |
|                       |                              |                                          | Epsti1                     | Epithelial stromal interaction 1 (breast)     | 7.2  | 1.9  | 31.1  |
|                       |                              |                                          | D12Ert647e                 | DNA segment, Chr 12, ERATO Doi 668 expressed  | 3.2  | 4.3  | 3.4   |
|                       |                              |                                          | Samd9l                     | Sterile alpha motif domain containing 9 like  | 2.6  | 3.5  | 21.7  |
|                       |                              |                                          | Phf11                      | PHD finger protein 11                         | 4.8  | 0    | 39.3  |
|                       |                              |                                          | Slfn2                      | Schlafen 2                                    | 4.0  | 0    | 27.6  |
|                       |                              |                                          | Slfn8                      | Schlafen 8                                    | 6.9  | 0    | 56.7  |
|                       |                              |                                          | Rnf213                     | Ring finger protein 213                       | 4    | 1.4  | 24.9  |
|                       |                              |                                          | RIKEN cDNA 9830115L13 gene | 3.6                                           | 4.2  | 18.0 |       |
|                       |                              |                                          | RIKEN cDNA                 | 0610037M15Rik                                 | 3.2  | 20.3 |       |
|                       |                              |                                          |                            | 0                                             | 2.6  | 2.8  | 9.7   |
|                       |                              |                                          | BC006779                   | 0610037M15 gene cDNA sequence BC006779        |      |      |       |
|                       |                              |                                          | Ddx60                      | DEAD (Asp-Glu-Ala-Asp) box polypeptide 60     | 17.4 | 9.6  | 54.6  |
|                       |                              |                                          |                            | Expressed sequence                            | 1.5  | 0    | 5.0   |
|                       |                              |                                          | Al413194                   | Al413194                                      | 8.5  | 11.4 | 33.7  |
|                       |                              |                                          |                            | Predicted gene                                |      |      |       |
|                       |                              |                                          | 100042856                  | 100042856                                     |      |      |       |
|                       |                              |                                          |                            | Predicted gene 677168                         | 15.5 | 49.8 | 167.3 |
|                       |                              |                                          |                            | Transmembrane protein                         | 0    | 2.4  | 8.5   |
|                       |                              |                                          | 677168 Tmem140             | 140                                           |      |      |       |
|                       |                              |                                          |                            | Apolipoprotein L9a                            | 0    | 4.6  | 35.9  |
|                       |                              |                                          | Apol 9a                    | NLR family CARD containing 5                  | 0    | 4.6  | 55.3  |
|                       |                              |                                          | Nlrc5                      | Probe set ID:1438027                          | 4.8  | 3.8  | 33.0  |
| Probe set ID: 1442201 | 2.4                          |                                          |                            |                                               |      |      |       |
| Probe set ID: 1447213 | 0                            | 5.6                                      |                            | 20.2                                          |      |      |       |
|                       |                              | 3.2                                      |                            | 6.7                                           |      |      |       |

<sup>a</sup>Identified genes were differentially regulated in the brains of reovirus infected mice at day 3 and/or day 6 post infection. Probe sets from Table 1 representing the same gene were combined and the fold increases for these probe sets were averaged. All genes that were not differentially regulated by at least 2-fold at any day post infection were excluded from the table. All identified differentially regulated genes (except one) were up-regulated in reovirus-infected, compared to mock-infected, animals, with a false detection rate (FDR) of 0.1 and  $P < .002$ . These genes were also up-regulated at day 8 post infection.
